# Supplementary material for: Effects of Physical Exercise on Cognition and Telomere Length in Healthy Older Women
Source: MDPI journal article supplement (doi:10.3390/brainsci11111417), 2021-10-27
Supplement: s1 [file s1]

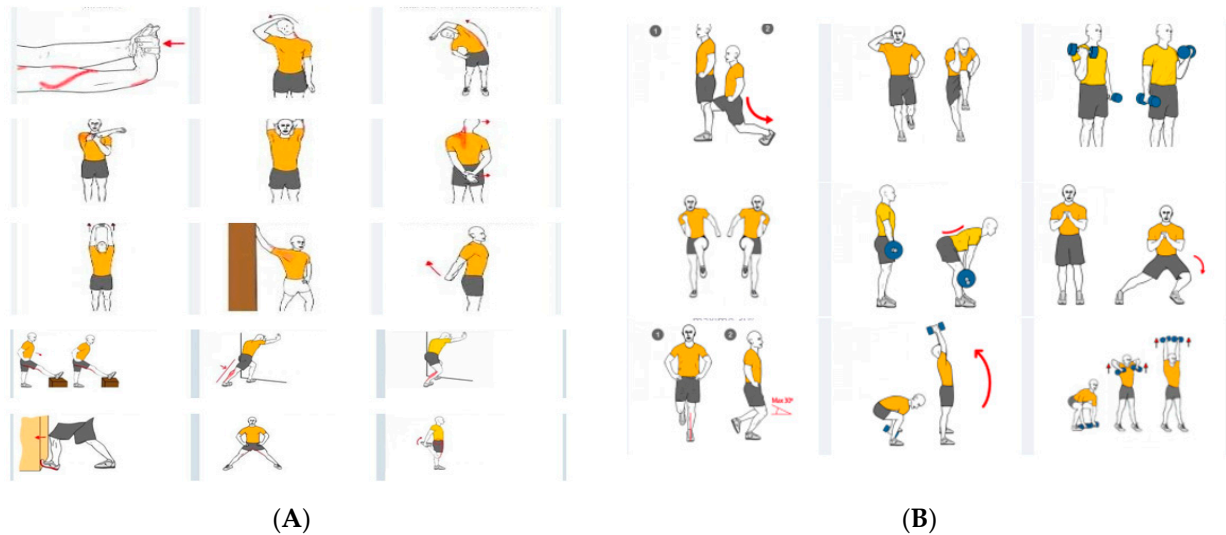

**Figure S1.** **A:** Main part: Between 10 and 15 repetitions each exercise with a rest of 1 minute between each exercise. **B:** Period of calm: Stretching of the main muscle groups.

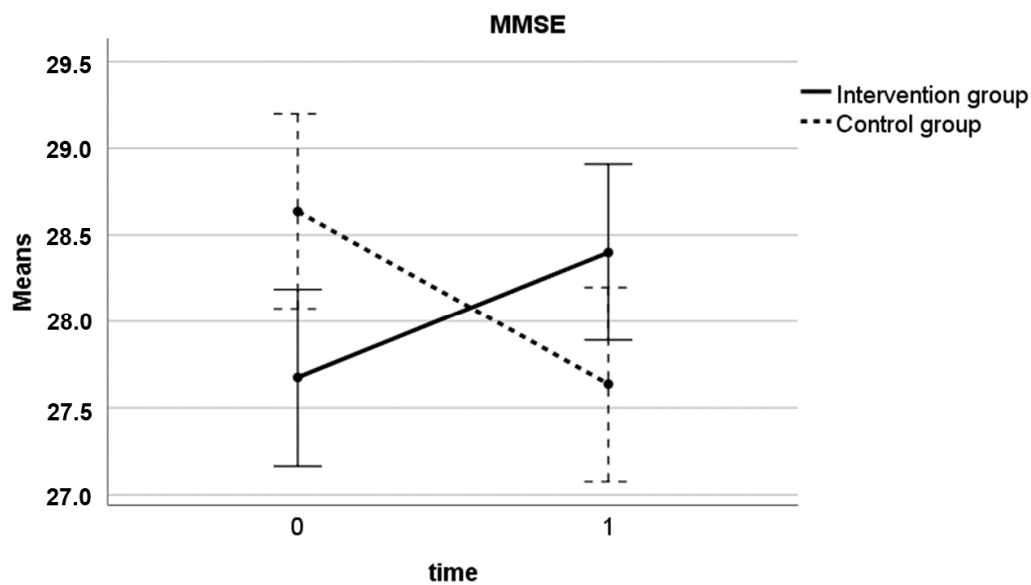

**Figure S2.** Interaction of both groups with respect to the MMSE. Mean  $\pm$  Standar Deviation\_ Time 0: scores obtained by the subjects in the Mini Mental State Examination before the intervention. Time 1: scores obtained by the subjects in the Mini Mental State Examination just after the intervention.

**Table S1.** Mean scores of the global index and accuracy of the age-corrected dimensions of the Stroop Test.

| Dimension    | Groups       | Time 0 |       | Time 1 |       |
|--------------|--------------|--------|-------|--------|-------|
|              |              | Mean   | SD    | Mean   | SD    |
| Words        | Intervention | 45.40  | 10.02 | 48.50  | 7.34  |
|              | Control      | 50.78  | 6.21  | 48.16  | 7.72  |
| Colors       | Intervention | 40.70  | 9.78  | 45.20  | 8.01  |
|              | Control      | 45.22  | 6.86  | 44.38  | 7.91  |
| Words/Colors | Intervention | 47.33  | 10.63 | 51.63  | 8.96  |
|              | Control      | 50.97  | 9.25  | 50.00  | 11.33 |
| Global Index | Intervention | 52.55  | 11.97 | 54.70  | 8.79  |
|              | Control      | 53.31  | 6.61  | 53.56  | 8.00  |

Note. SD = Standar Deviation. Words = number of items properly in 45 seconds in the Words Condition; Colors = number of items properly named in 45 seconds in the Colors Condition; Words/Colors: number of items properly named in 45 seconds in the Words/Colors Condition. Global index or Interference Values have been adjusted for age.

## **Supplementary List S1**

### **Dinamic warm-up**

Mobility of the main joints:

- Opening and closing the hands
- Circumduction of wrists
- Elbow flexion-extension
- Circumduction of shoulders
- Bringing the arms together and spreading them apart
- Raise the shoulders
- Alternately raise your arms in extension until they are in line with your head.
- Rotation of the trunk in the vertical axis
- Lateral flexion of the trunk in the anteroposterior axis
- Flexion of the trunk in the transverse axis
- Circumduction of the hip
- Semitandem leg flexion, with trunk flexion
- Arm in extension above the hip, with trunk flexion touching the opposite knee.
- Skipping or hip flexion to  $\approx 90^\circ$ .
- Lateral hip flexion up to  $\approx 90^\circ$  (open leg)
- Total knee flexion (heels to butt)
- Circumduction of knees
- Walking backwards
- Lateral walk
- Crossed front and back walk
- Circumduction of ankles
- 10 minutes of jogging
